# Supplementary material for: Identification of Compounds with Anti-Proliferative Activity against Trypanosoma brucei brucei Strain 427 by a Whole Cell Viability Based HTS Campaign
Source: PLoS Negl Trop Dis. 2012 Nov 29;6(11):e1896. doi: 10.1371/journal.pntd.0001896 (PMC3510080; doi:10.1371/journal.pntd.0001896)
Supplement: Table S4 — (XLSX) [file pntd.0001896.s004.xlsx]

## Sheet: ChemOffice1
Entry	Structure	Compound ID	Primary Screening Activity 10.2µM (%)	Retested?	Retest IC50 T.b.brucei (µM)	Restest IC50 HEK (µM)	Estimated Selectivity Index
1	C17H10ClN3O3	WEHI-0055195	100	Yes, parent compound	0.169	>41.7	246
2	C16H14ClN3O2	WEHI-0069265	99	Yes, did not pass medicinal chemistry analysis	0.8508	41.67	48.9774
3	C18H13N3O3	WEHI-0069824	-2	No
4	C19H13ClN2O3	WEHI-0076299	2	No
5	C19H12ClN3O3	WEHI-0079330	32	No
6	C19H11ClFN3O2	WEHI-0079813	100	Yes, did not reconfirm	18% at 10.4µM	NA	NA
7	C20H14ClN3O3	WEHI-0082839	0	No
8	C18H12BrN3O2	WEHI-0083398	16	No
9	C22H19N3O4	WEHI-0085569	12	No
10	C21H16ClN3O3	WEHI-0086989	15	No
11	C19H12BrN3O2	WEHI-0087051	10	No
12	C20H14ClN3O2S	WEHI-0087666	-4	No
13	C18H11N3O5S	WEHI-0105326	30	No
14	C18H11BrN2O4	WEHI-0105334	-3	No
15	C20H15N3O2	WEHI-0105383	2	No
16	C19H12N4O4	WEHI-0105455	4	No
17	C20H13ClN4O4	WEHI-0105456	6	No
18	C20H14ClN3O3	WEHI-0105462	0	No
19	C20H11FN4O2	WEHI-1193373	0	No
